# Supplementary material for: Crosstalk between transforming growth factor β-2 and Autotaxin in trabecular meshwork and different subtypes of glaucoma
Source: PubMed Central journal article supplement (PMC8212476; doi:10.1186/s12929-021-00745-3), 2021-06-17
Supplement: 12929_2021_745_MOESM1_ESM.pdf [file 12929_2021_745_MOESM1_ESM.pdf]

**Supplemental Figure 1: Correlations of IOP with levels of aqueous ATX, TGF- $\beta$ 1, TGF- $\beta$ 2, and TGF- $\beta$ 3 among glaucoma subtypes.**

**POAG**

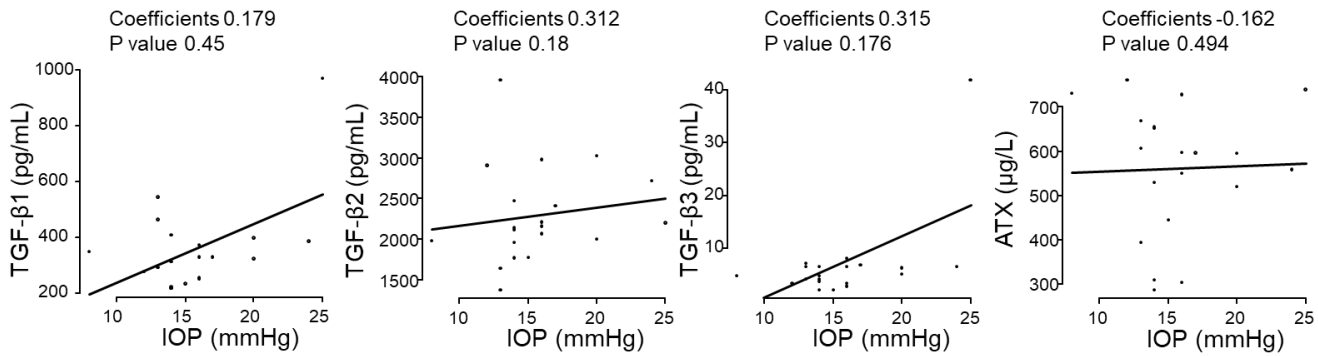

**SOAG**

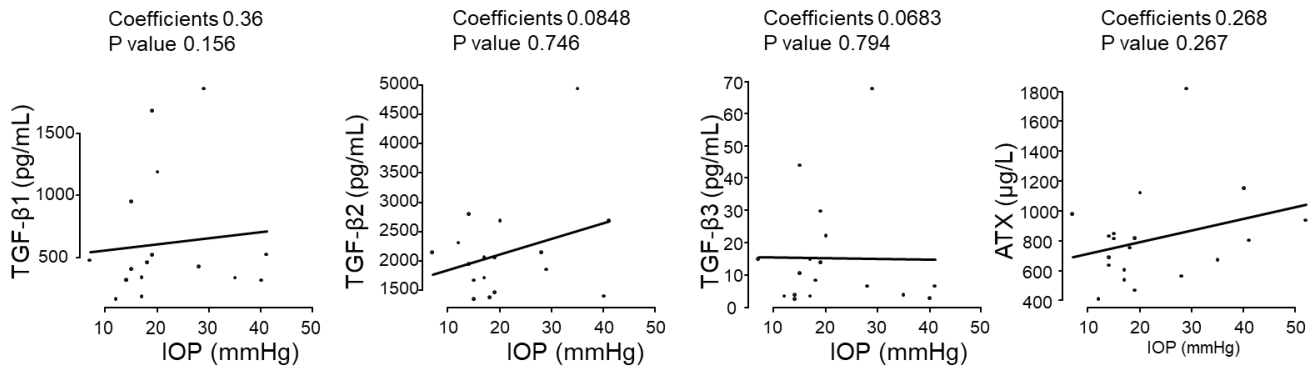

**XFG**

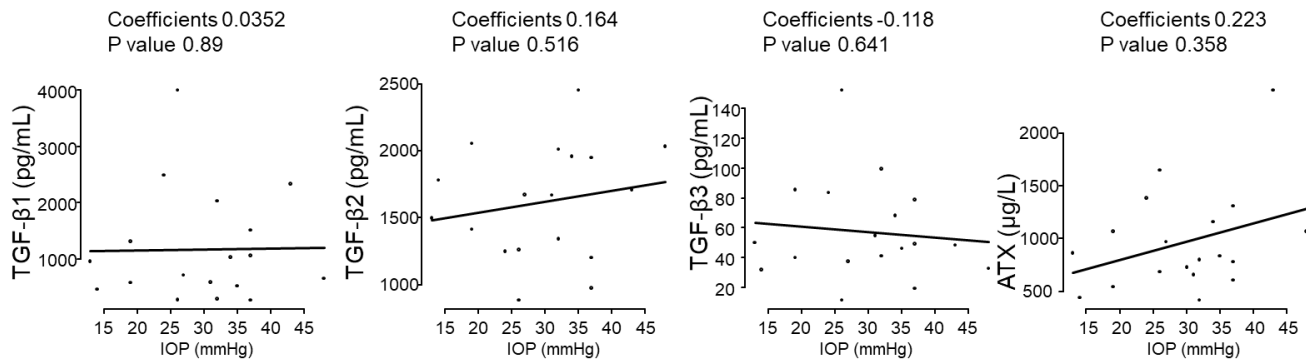

No significant correlations were observed between IOP and levels of aqueous ATX, TGF- $\beta$ 1, TGF- $\beta$ 2, or TGF- $\beta$ 3 when eyes were stratified among glaucoma subtypes.

**Supplemental Figure 2: Correlations between aqueous ATX and TGF- $\beta$ 1–3 in different glaucoma subtypes.**

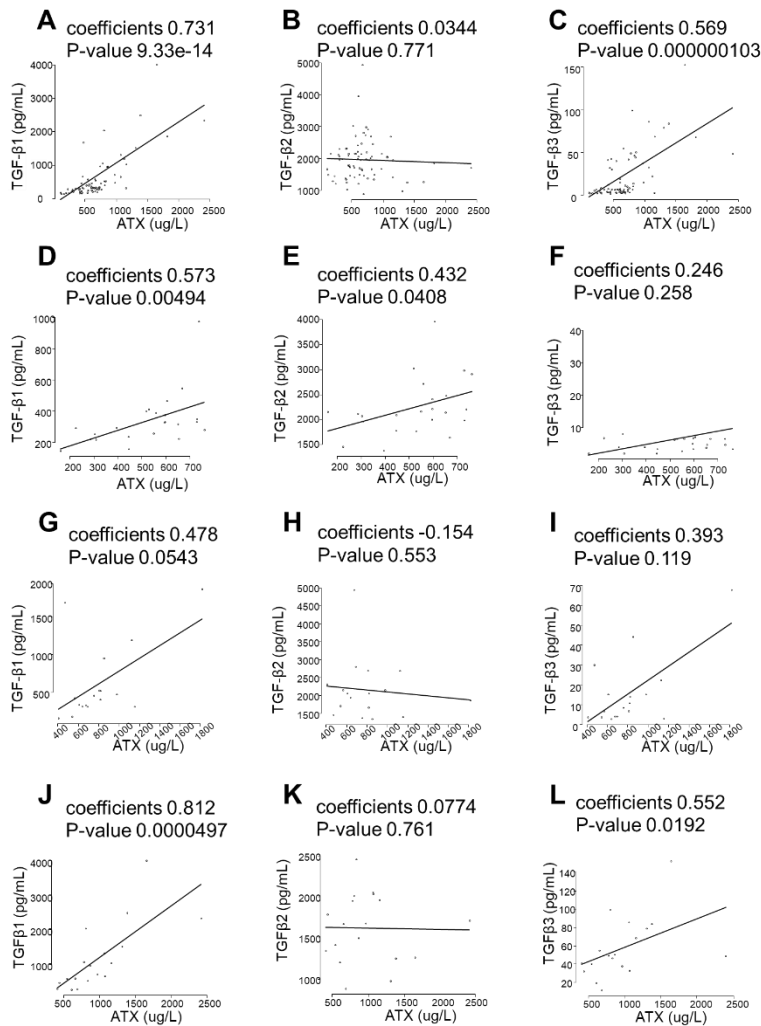

**(A–C) Correlations between levels of aqueous ATX and levels of aqueous TGF- $\beta$ 1–3 in the overall cohort.** Levels of TGF- $\beta$ 1 (A; Spearman's rank correlation coefficient = 0.731,  $P = 9.33e-14$ ) and TGF- $\beta$ 3 (B; Spearman's rank correlation coefficient = 0.569,  $P = 0.000000103$ ) were positively correlated with the level of ATX, whereas the level of TGF- $\beta$ 2 was not (C; Spearman's rank correlation coefficient = 0.0344,  $P = 0.771$ ).

**(D–F) Correlations between levels of aqueous ATX and levels of aqueous TGF- $\beta$ 1–3 in the POAG group.** Levels of TGF- $\beta$ 1 (D; Spearman's rank correlation coefficient = 0.573,  $P = 0.00494$ ) and TGF- $\beta$ 2 (E; Spearman's rank correlation coefficient = 0.432,  $P = 0.0408$ ) were positively correlated with the level of ATX, whereas the level of TGF- $\beta$ 3 was not (F; Spearman's rank correlation coefficient = 0.246,  $P = 0.258$ ).

**(G–I) Correlations between levels of aqueous ATX and levels of aqueous TGF- $\beta$ 1–3 in the SOAG group.** Levels of TGF- $\beta$ 1 (G; Spearman's rank correlation coefficient = 0.478,  $P = 0.0543$ ), TGF- $\beta$ 2 (H; Spearman's rank correlation coefficient = -0.154,  $P = 0.553$ ), and TGF- $\beta$ 3 (I; Spearman's rank correlation coefficient = 0.393,  $P = 0.119$ ) were not correlated with the level of ATX.

**(J–L) Correlations between levels of aqueous ATX and levels of aqueous TGF- $\beta$ 1–3 in the XFG group.** Levels of TGF- $\beta$ 1 (J; Spearman's rank correlation coefficient = 0.812,  $P = 0.0000497$ ) and TGF- $\beta$ 3 (K; Spearman's rank correlation coefficient = 0.552,  $P = 0.0192$ ) were positively correlated with the level of ATX, whereas the level of TGF- $\beta$ 2 was not (L; Spearman's rank correlation coefficient = 0.0774,  $P = 0.761$ ).
